# Supplementary material for: Synthesis of a fluorinated Ezetimibe analogue using radical allylation of α-bromo-α-fluoro-β-lactam
Source: Royal Society of Chemistry journal article supplement (doi:10.1039/c5nj01969a), 2015-01-01

## Supporting Information

### **Synthesis of fluorinated Ezetimibe analogue using radical alkylation of $\alpha$ -bromo- $\alpha$ -fluoro- $\beta$ -lactam**

Atsushi Tarui,<sup>a</sup> Ayumi Tanaka,<sup>a</sup> Masakazu Ueo,<sup>a</sup> Kazuyuki Sato,<sup>a</sup> Masaaki Omote<sup>a</sup> and Akira Ando\*

Faculty of Pharmaceutical Sciences, Setsunan University, 45-1, Nagaotoge-cho, Hirakata, Osaka 573-0101, Japan

[tarui-a@pharm.setsunan.ac.jp](mailto:tarui-a@pharm.setsunan.ac.jp), [aando@pharm.setsunan.ac.jp](mailto:aando@pharm.setsunan.ac.jp)

#### **Table of contents**

|                                                          |     |
|----------------------------------------------------------|-----|
| Copies of <sup>1</sup> H and <sup>13</sup> C NMR Spectra | 2–6 |
|----------------------------------------------------------|-----|

Copies of  $^1\text{H}$  and  $^{13}\text{C}$  NMR Spectra

In  $\text{CDCl}_3$

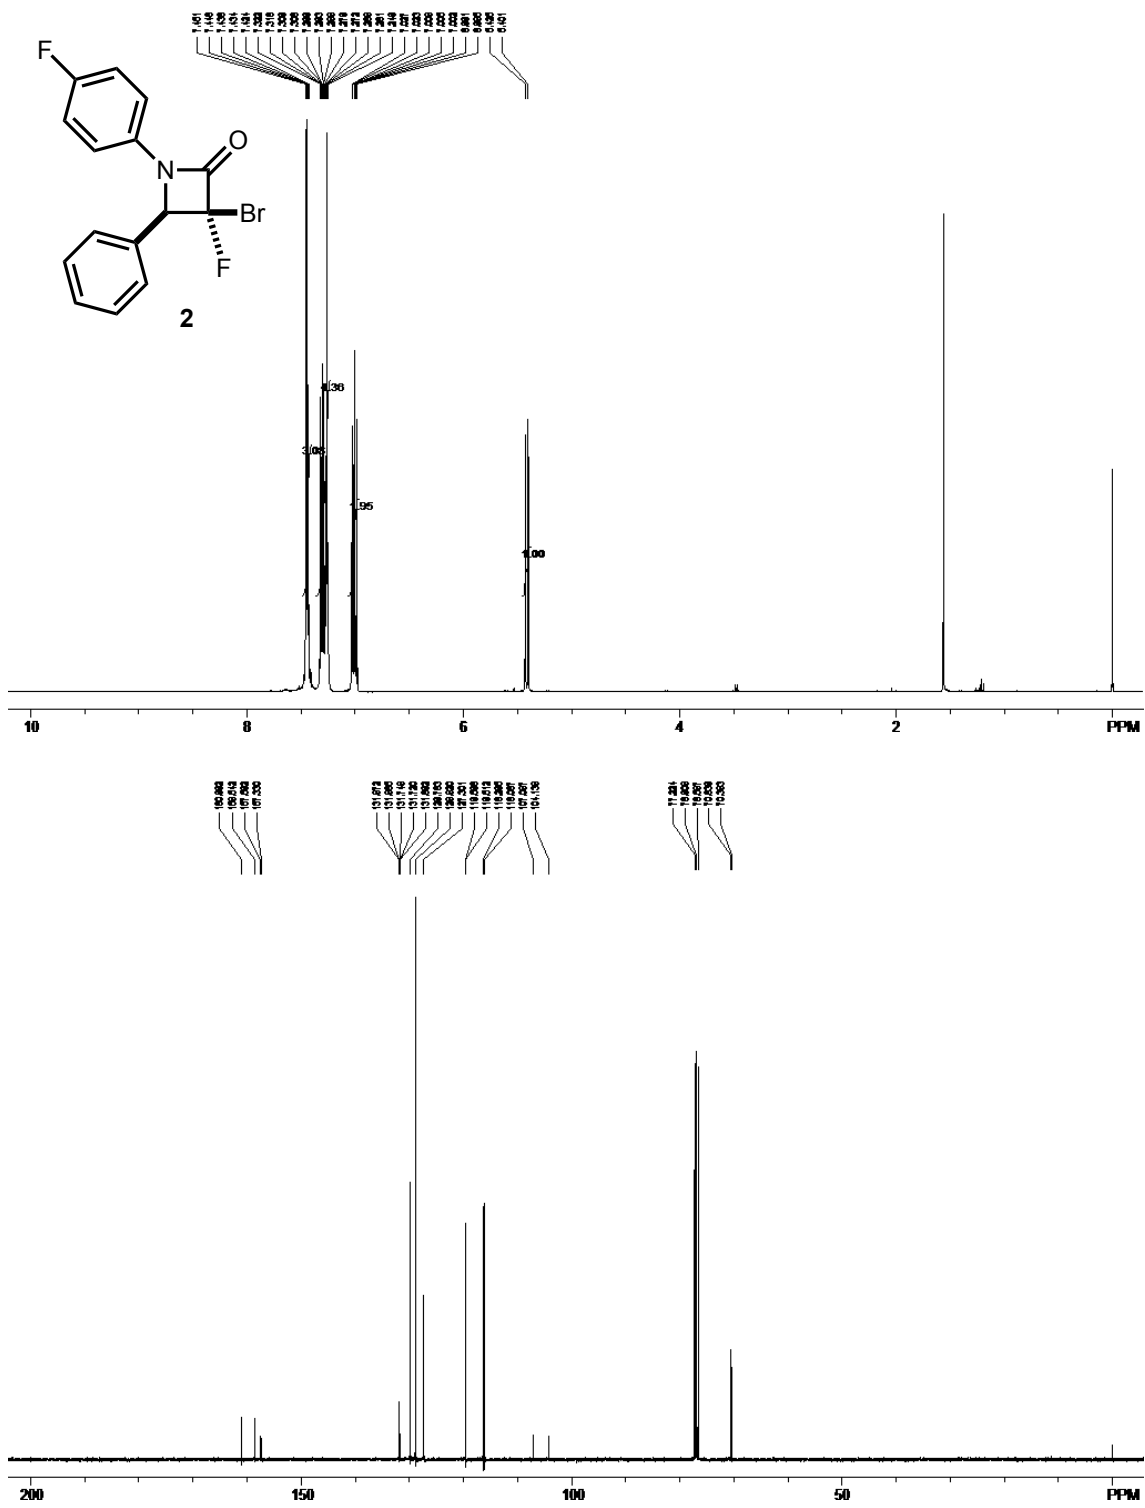

In CDCl<sub>3</sub>

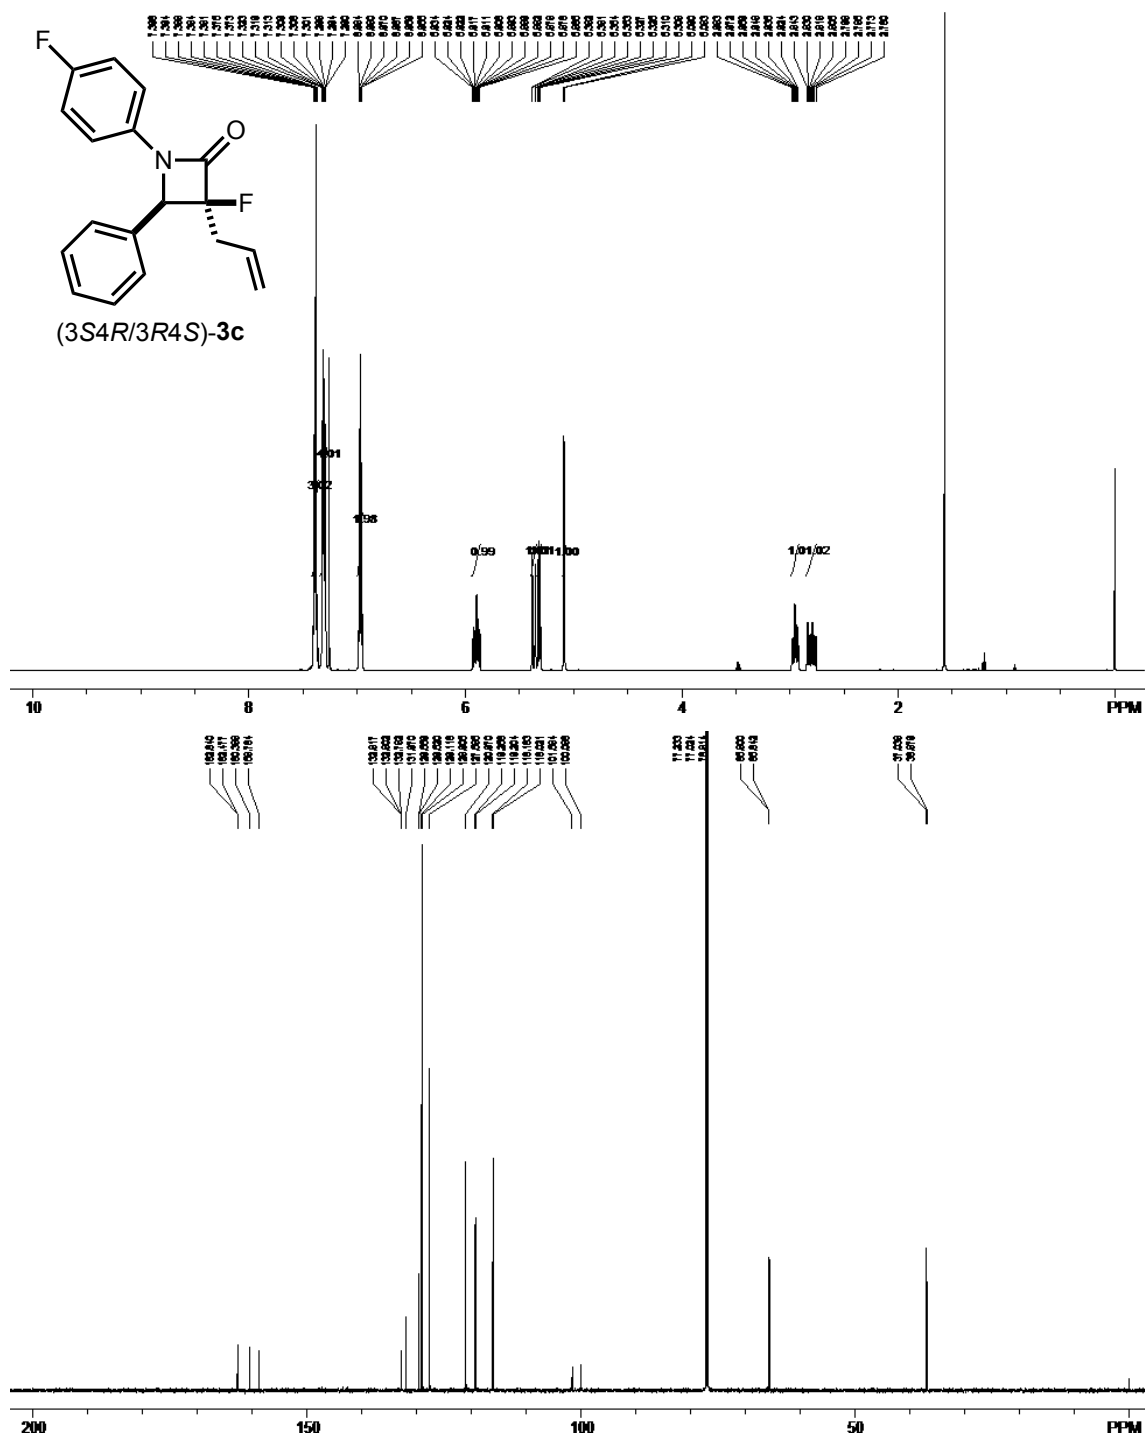





In DMSO-d<sub>6</sub>, 45°C

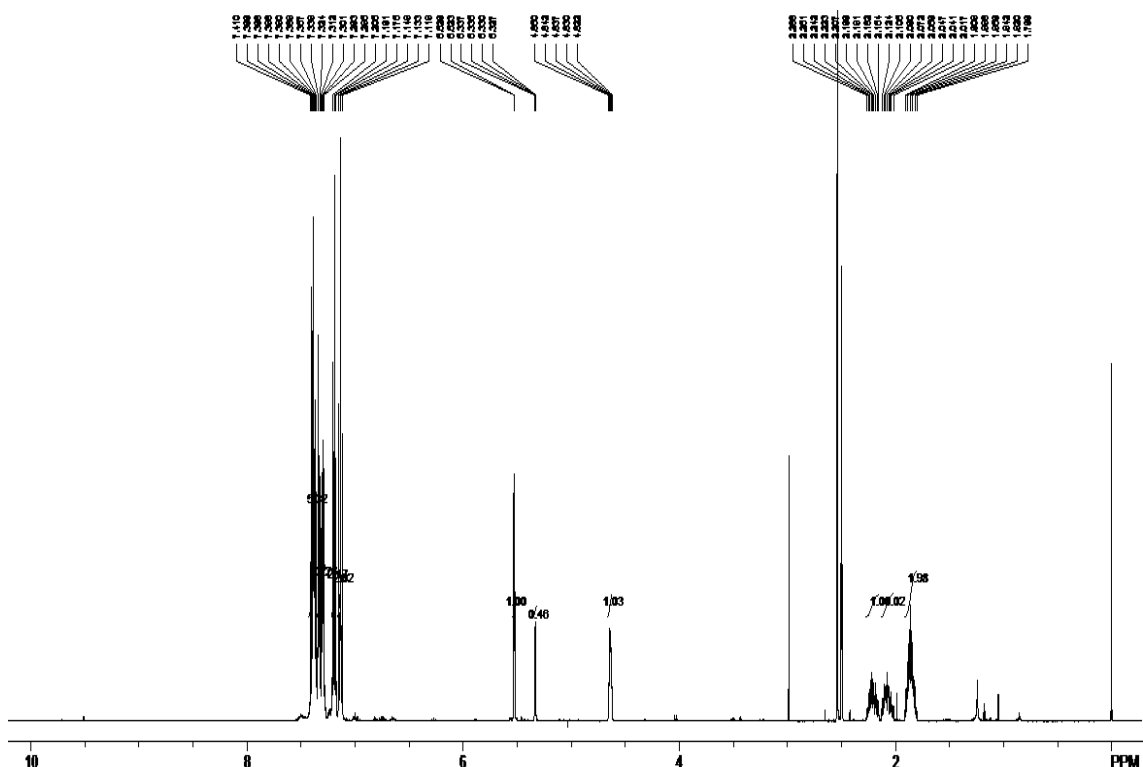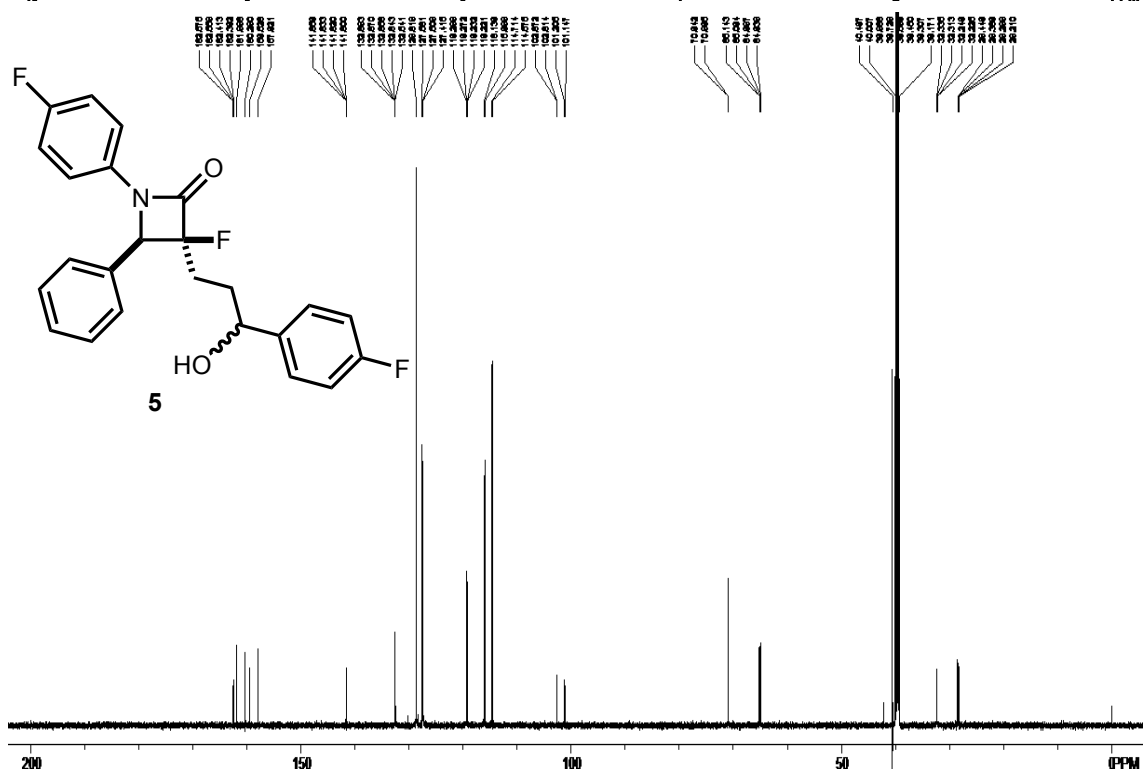

Supplement: c5nj01969a1.pdf [file c5nj01969a1.pdf]
